# Supplementary material for: Genetic Diversity, Population Structure and Linkage Disequilibrium Analyses in Tropical Maize Using Genotyping by Sequencing
Source: MDPI journal article supplement (doi:10.3390/plants11060799), 2022-03-17
Supplement: s1 [file s1]

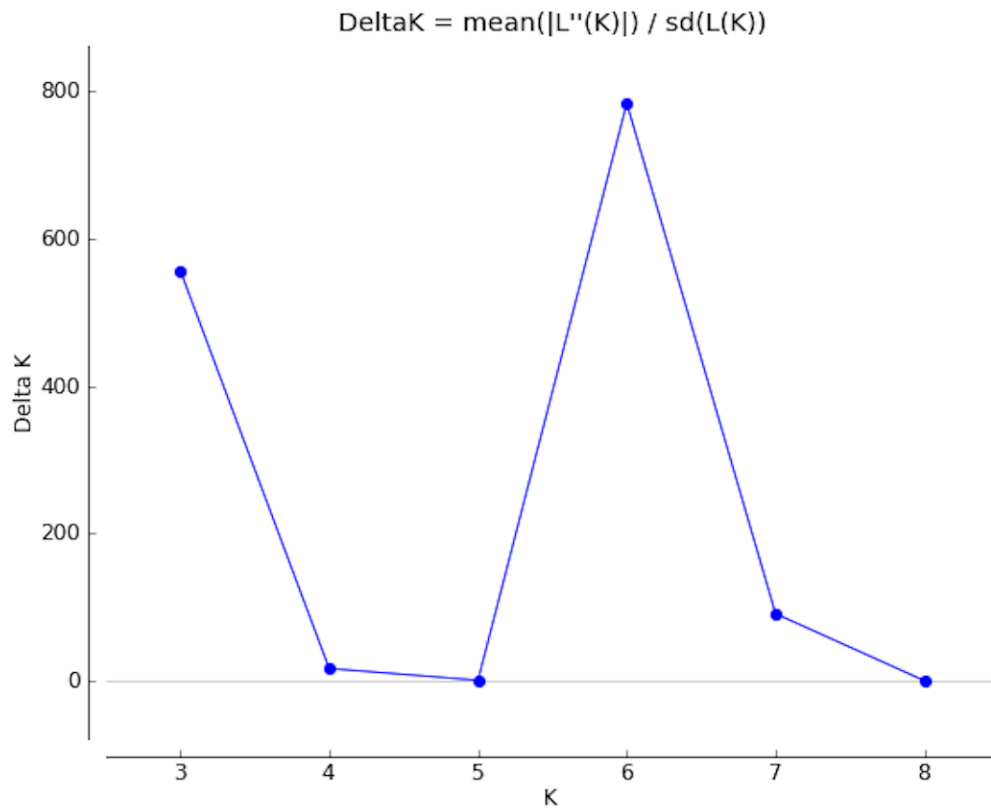

**Figure S2.** A lot of ad hoc statistics  $\Delta K$  computed from changes of  $\text{LnP}(D)$  between  $K = 2$  to  $K = 9$ . The highest peak at  $K = 6$  suggests six sub-populations (groups) in the panel.
