# Supplementary material for: Genetic Diversity, Population Structure and Linkage Disequilibrium Analyses in Tropical Maize Using Genotyping by Sequencing
Source: MDPI journal article supplement (doi:10.3390/plants11060799), 2022-03-17
Supplement: s1 [file s1]

**Table S5.** Mean LD ( $r^2$ ) values across the ten maize chromosomes at different physical distances and  $\text{MAF} \geq 0.05$ .

| Distance (kb)    | Chr.1 | Chr.2 | Chr.3 | Chr.4 | Chr.5 | Chr.6 | Chr.7 | Chr.8 | Chr.9 | Chr.10 | Over all<br>mean LD |
|------------------|-------|-------|-------|-------|-------|-------|-------|-------|-------|--------|---------------------|
| 0-0.1            | 0.70  | 0.67  | 0.69  | 0.68  | 0.70  | 0.66  | 0.68  | 0.71  | 0.67  | 0.74   | 0.69                |
| 0.1-0.2          | 0.68  | 0.41  | 0.60  | 0.51  | 0.44  | 0.58  | 0.44  | 0.41  | 0.50  | 0.30   | 0.49                |
| 0.2-0.3          | 0.66  | 0.65  | 0.68  | 0.67  | 0.71  | 0.64  | 0.67  | 0.67  | 0.63  | 0.75   | 0.67                |
| 0.3-0.4          | 0.51  | 0.41  | 0.60  | 0.51  | 0.44  | 0.58  | 0.44  | 0.41  | 0.50  | 0.30   | 0.47                |
| 0.4-0.6          | 0.52  | 0.45  | 0.58  | 0.48  | 0.61  | 0.52  | 0.55  | 0.44  | 0.56  | 0.57   | 0.53                |
| 0.6-1.0          | 0.59  | 0.47  | 0.57  | 0.53  | 0.55  | 0.56  | 0.55  | 0.51  | 0.57  | 0.44   | 0.53                |
| 1.0-1.5          | 0.45  | 0.48  | 0.54  | 0.52  | 0.60  | 0.45  | 0.53  | 0.48  | 0.42  | 0.60   | 0.51                |
| 1.5-2.0          | 0.59  | 0.51  | 0.61  | 0.47  | 0.53  | 0.55  | 0.57  | 0.46  | 0.50  | 0.48   | 0.53                |
| 2.0-5.0          | 0.51  | 0.49  | 0.58  | 0.57  | 0.64  | 0.52  | 0.52  | 0.58  | 0.53  | 0.59   | 0.55                |
| 5.0-10.0         | 0.58  | 0.51  | 0.55  | 0.53  | 0.55  | 0.49  | 0.52  | 0.56  | 0.52  | 0.53   | 0.53                |
| 10.0-100.0       | 0.52  | 0.46  | 0.51  | 0.48  | 0.54  | 0.44  | 0.46  | 0.56  | 0.43  | 0.53   | 0.49                |
| 100.0-1000.0     | 0.42  | 0.34  | 0.47  | 0.36  | 0.48  | 0.32  | 0.40  | 0.50  | 0.32  | 0.44   | 0.40                |
| 1000.0-5000.0    | 0.31  | 0.26  | 0.45  | 0.24  | 0.44  | 0.21  | 0.32  | 0.40  | 0.23  | 0.36   | 0.32                |
| 5000.0-10000.0   | 0.22  | 0.21  | 0.41  | 0.20  | 0.28  | 0.19  | 0.30  | 0.25  | 0.21  | 0.28   | 0.25                |
| 10000.0-100000.0 | 0.17  | 0.19  | 0.26  | 0.18  | 0.17  | 0.17  | 0.21  | 0.16  | 0.20  | 0.20   | 0.19                |
| >100000.0        | 0.14  | 0.15  | 0.16  | 0.15  | 0.15  | 0.16  | 0.15  | 0.14  | 0.13  | 0.16   | 0.15                |
| Mean             | 0.47  | 0.42  | 0.52  | 0.44  | 0.49  | 0.44  | 0.46  | 0.45  | 0.43  | 0.45   | 0.46                |
