# Supplementary material for: Genetic Diversity, Population Structure and Linkage Disequilibrium Analyses in Tropical Maize Using Genotyping by Sequencing
Source: MDPI journal article supplement (doi:10.3390/plants11060799), 2022-03-17
Supplement: s1 [file s1]

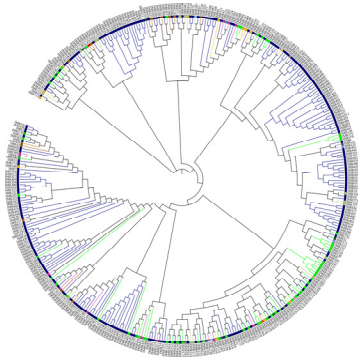

**Variable 1.** Clustering represented based on centers

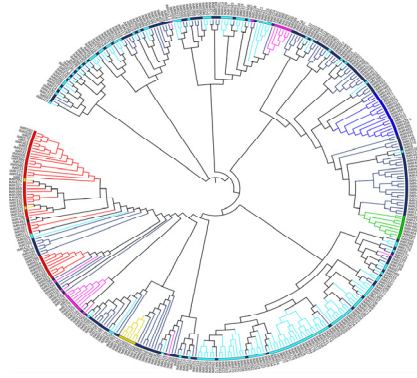

**Variable 2.** Clustering based on population structure

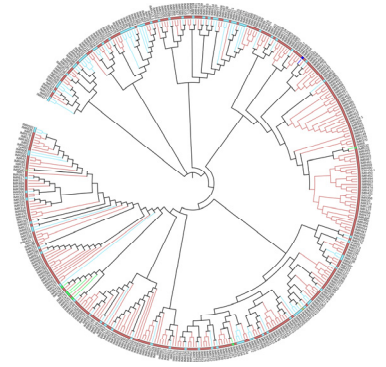

**Variable 3.** Clustering based on type of corn

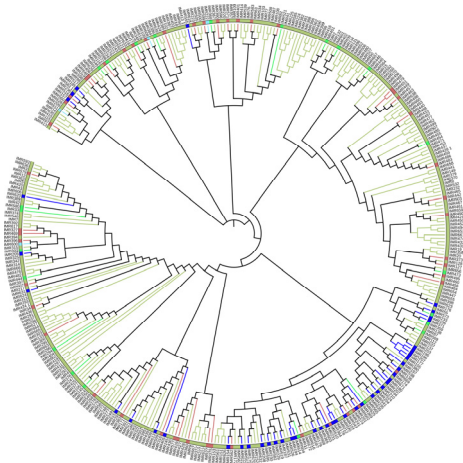

**Variable 4.** Clustering represented based on kernel colours

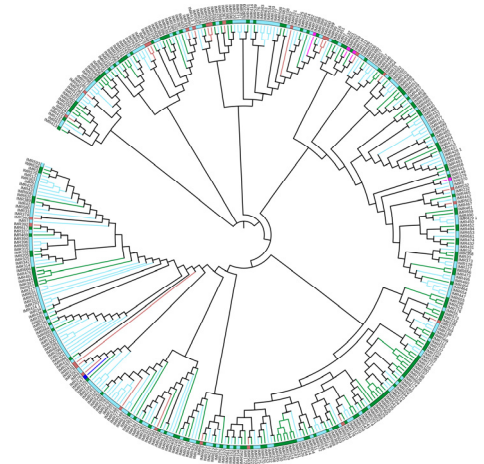

**Variable 5.** Clustering represented based on maturity

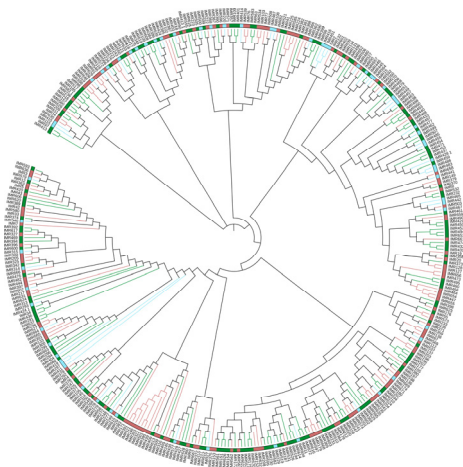

**Variable 6.** Clustering represented based on plant height

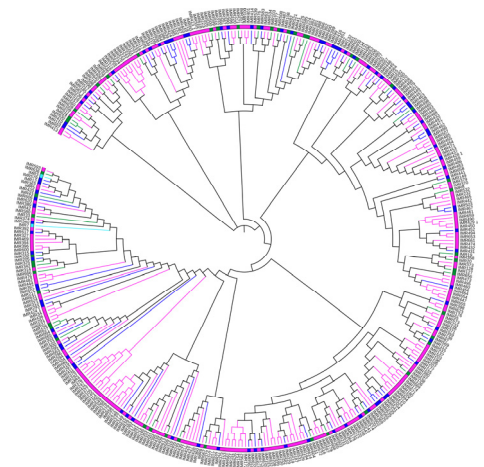

**Variable 7.** Clustering represented based on ear height

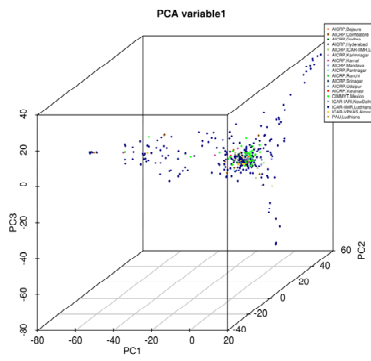

**Variable 1.** PCA represented based on the centers

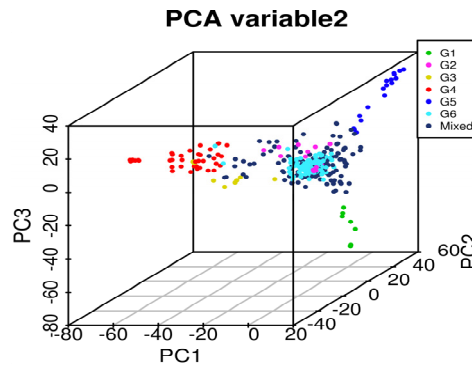

**Variable 2.** PCA represented based on population structure

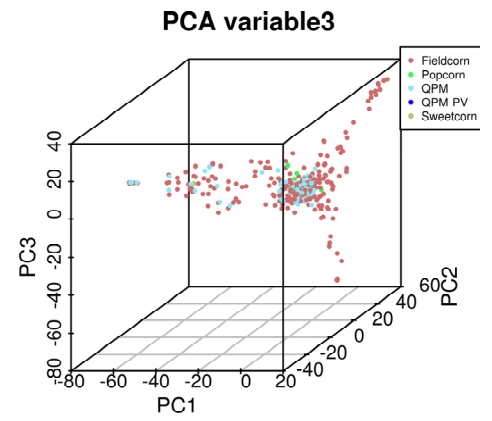

**Variable 3.** PCA represented based on type of corn

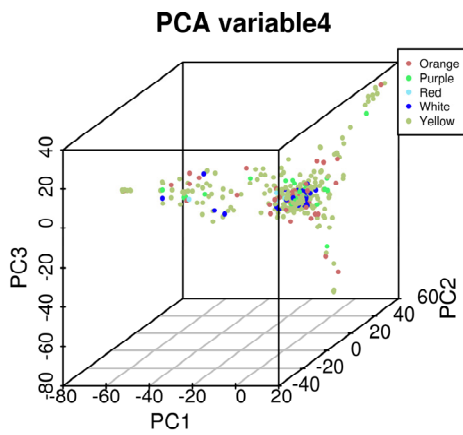

**Variable 4.** PCA represented based on kernel colour

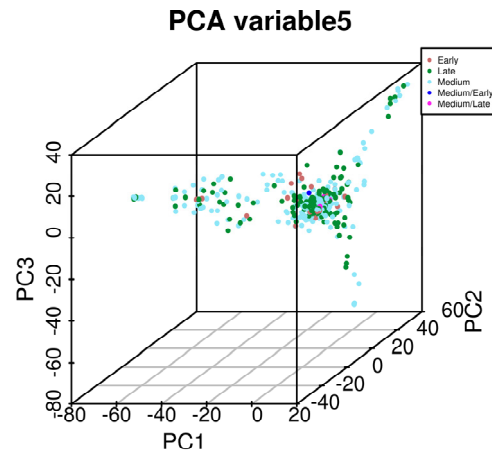

**Variable 5.** PCA represented based on maturity

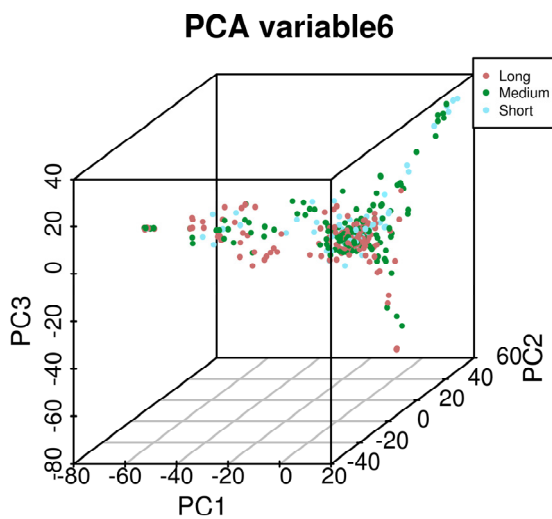

**Variable 6.** PCA represented based on based plant height

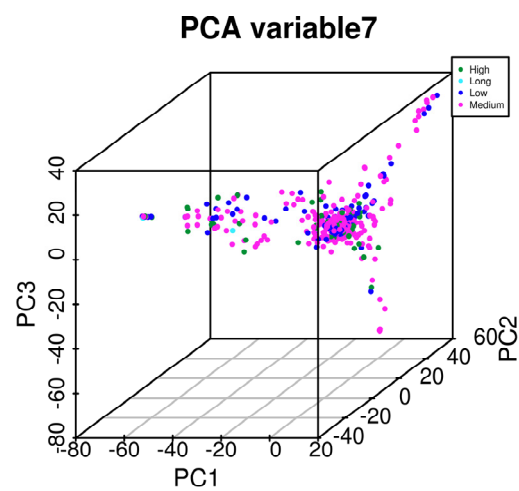

**Variable 7.** PCA represented based on based ear height placement

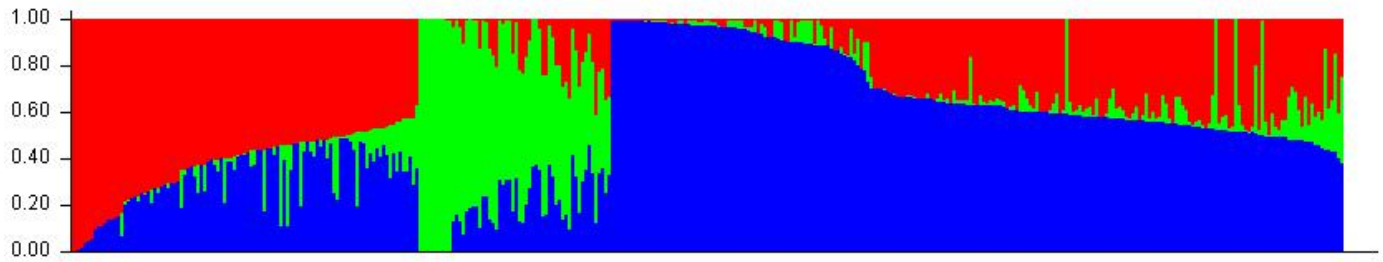

Population structure of 384 maize inbred lines revealed by 60277 SNP markers.

Figure S1. Different phylogenetic trees and PCA plots for 384 lines genotyped using 60,277 SNPs and represented based on seven variables such as center, population structure, types of corn, kernel colour, maturity group, plant height and ear height placement.
